# Supplementary material for: Asymmetric total synthesis of (1S,2S,4S)-β-elemene
Source: Royal Society of Chemistry journal article supplement (doi:10.1039/d2ra01408d), 2022-01-01
Supplement: d2ra01408d1.pdf [file d2ra01408d1.pdf]

## Supporting Information

### Asymmetric total synthesis of (1*S*,2*S*,4*S*)- $\beta$ -elemene

Wei Chen<sup>a,b</sup>, Zhun Feng<sup>\*,a</sup>, and Qiang Liu<sup>\*,b</sup>

<sup>a</sup> Guangdong-Macao Traditional Chinese Medicine Technology Industrial Park Development Co., Ltd., Zhuhai 519031, P. R. of China.

<sup>b</sup> School of Chinese Medicine, Southern Medicinal University, Guangzhou 510515, P. R. of China.

E-mail: zhun.feng@gmtcpark.com (Z. Feng); gzlq2002@163.com (Q. Liu)

Part 1: NMR spectra comparison-----S1

Part 2: Copies of NMR spectra -----S2

## 1. NMR spectra comparison of synthetic 3 and the isolated natural product

| <sup>1</sup> H NMR (δ, ppm)<br>(500 MHz, CDCl <sub>3</sub> )<br>Shi, et al <sup>[1]</sup> | <sup>1</sup> H NMR (δ, ppm)<br>(500 MHz, CDCl <sub>3</sub> )<br>This work | <sup>13</sup> C NMR (δ, ppm)<br>(125 MHz, CDCl <sub>3</sub> )<br>Shi, et al <sup>[1]</sup> | <sup>13</sup> C NMR (δ, ppm)<br>(125 MHz, CDCl <sub>3</sub> )<br>This work |
|-------------------------------------------------------------------------------------------|---------------------------------------------------------------------------|--------------------------------------------------------------------------------------------|----------------------------------------------------------------------------|
| 5.82 (dd, <i>J</i> =17.5, 10.9 Hz, 1H)                                                    | 5.82 (dd, <i>J</i> =17.5, 11.0 Hz, 1H)                                    | 150.22                                                                                     | 150.2                                                                      |
| 4.91 (dd, <i>J</i> =18.1, 1.0 Hz)                                                         | 4.93 (dd, <i>J</i> =8.3, 1.0 Hz, 1H)                                      | 148.18                                                                                     | 148.2                                                                      |
| 4.90 (dd, <i>J</i> =10.5, 1.0 Hz)                                                         | 4.90 (s, 1H)                                                              | 147.99                                                                                     | 147.9                                                                      |
| 4.85 (s, 1H)                                                                              | 4.86 (d, <i>J</i> =1.2 Hz, 1H)                                            | 112.37                                                                                     | 112.4                                                                      |
| 4.84 (s, 1H)                                                                              | 4.84 (m, 1H)                                                              | 110.19                                                                                     | 110.17                                                                     |
| 4.79 (s, 1H)                                                                              | 4.79 (s, 1H)                                                              | 110.11                                                                                     | 110.15                                                                     |
| 4.68 (s, 1H)                                                                              | 4.68 (s, 1H)                                                              | 47.77                                                                                      | 47.7                                                                       |
| 2.36 (m, 1H)                                                                              | 2.40 – 2.32 (m, 1H)                                                       | 39.83                                                                                      | 39.8                                                                       |
| 2.18 (dd, <i>J</i> =9.1, 4.6 Hz, 1H)                                                      | 2.18 (m, 1H)                                                              | 39.11                                                                                      | 39.1                                                                       |
| 1.75 (s, 3H)                                                                              | 1.75 (s, 3H)                                                              | 34.74                                                                                      | 34.7                                                                       |
| 1.74 (s, 3H)                                                                              | 1.73 (s, 3H)                                                              | 30.29                                                                                      | 30.2                                                                       |
| 1.60-1.72 (m, 5H)                                                                         | 1.57-1.78 (m, 5H)                                                         | 25.46                                                                                      | 25.5                                                                       |
| 1.32 (m, 1H)                                                                              | 1.32 (m, 1H)                                                              | 24.70                                                                                      | 24.6                                                                       |
| 1.02 (s, 3H)                                                                              | 1.02 (s, 3H)                                                              | 22.27                                                                                      | 22.30                                                                      |
|                                                                                           |                                                                           | 22.20                                                                                      | 22.29                                                                      |
|                                                                                           |                                                                           |                                                                                            |                                                                            |

[1] Y. M. Shi, R. Y. Wang, X. Feng, X. T. Chen, J. Li, A. L. He, J. Shi, Y. M. Yuan, Y. C. Wang and S. Liu, *CN Pat.*, CN 109438166 B, 2021.

## 2. NMR spectra

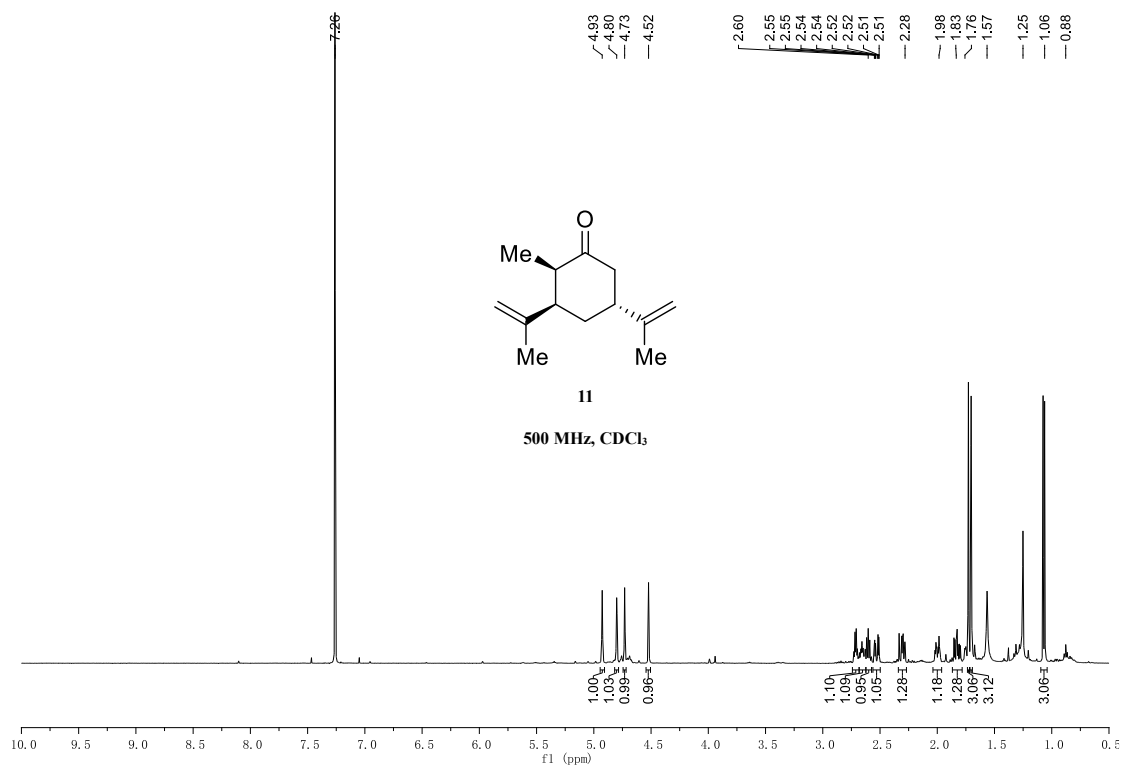

<sup>1</sup>H NMR of compound 11

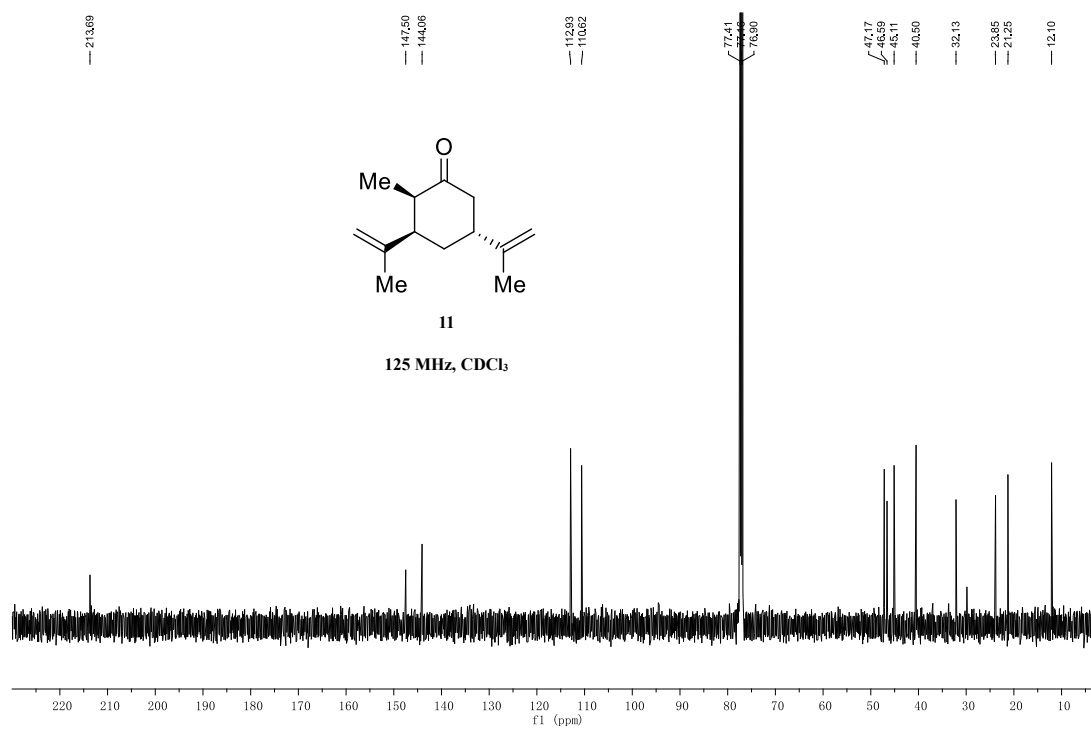

<sup>13</sup>C NMR of compound 11

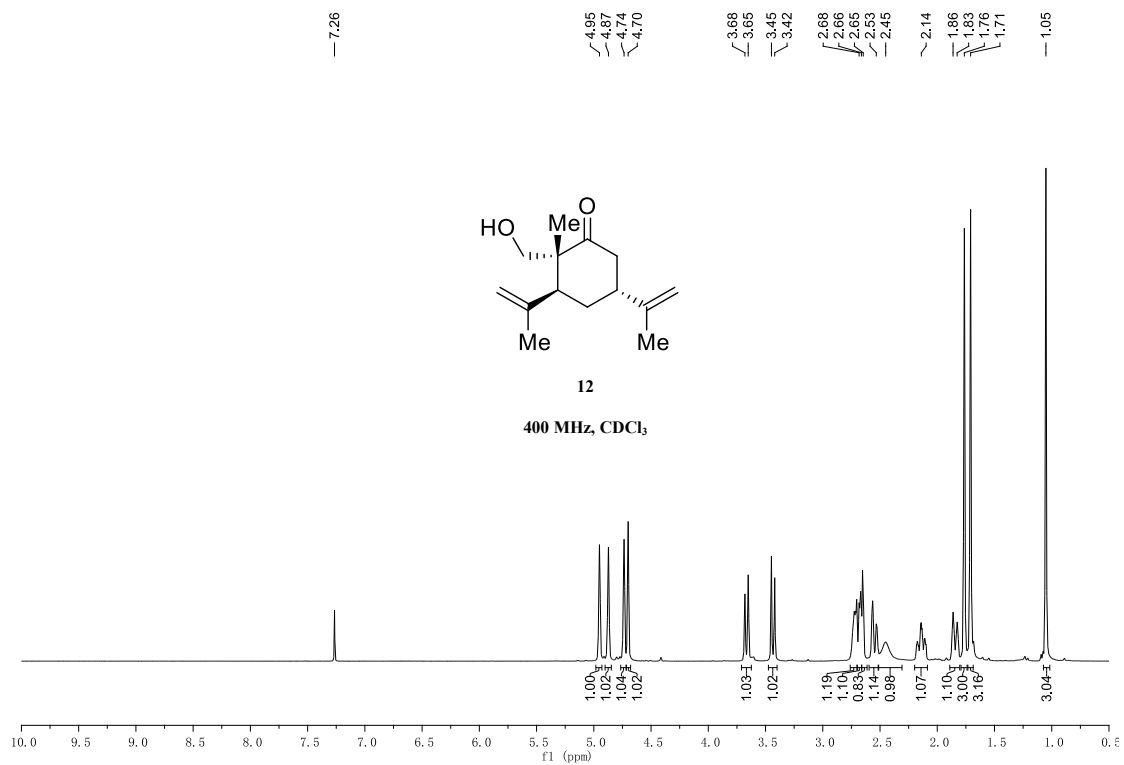

$^1\text{H}$  NMR of compound **12**

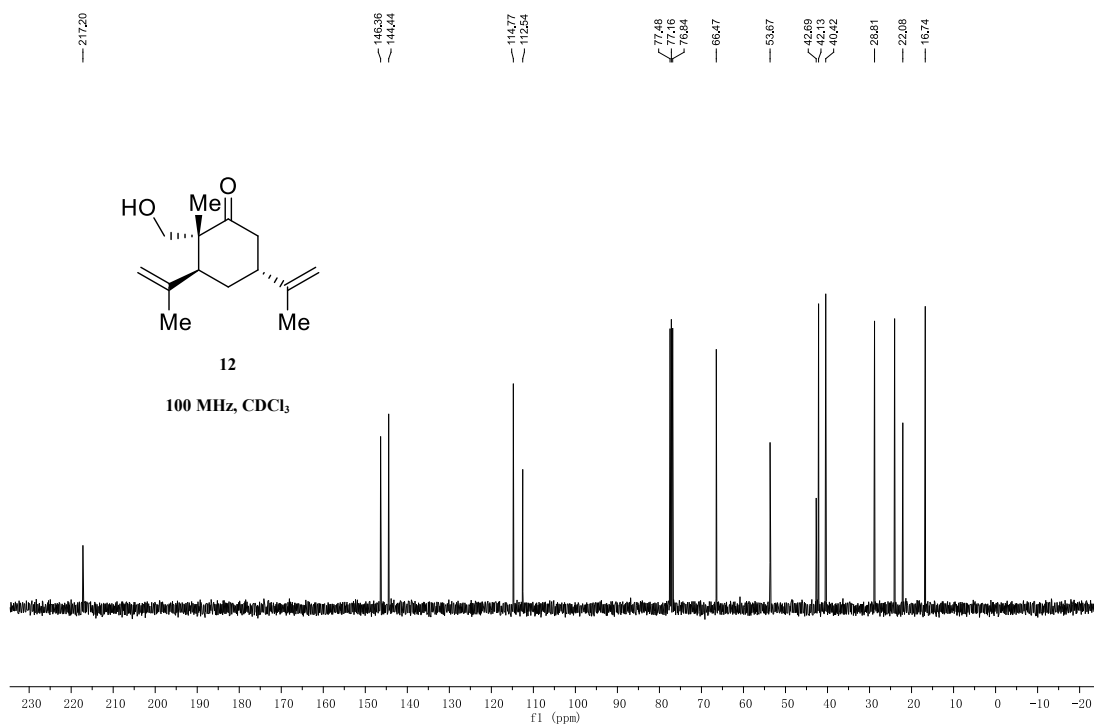

$^{13}\text{C}$  NMR of compound **12**

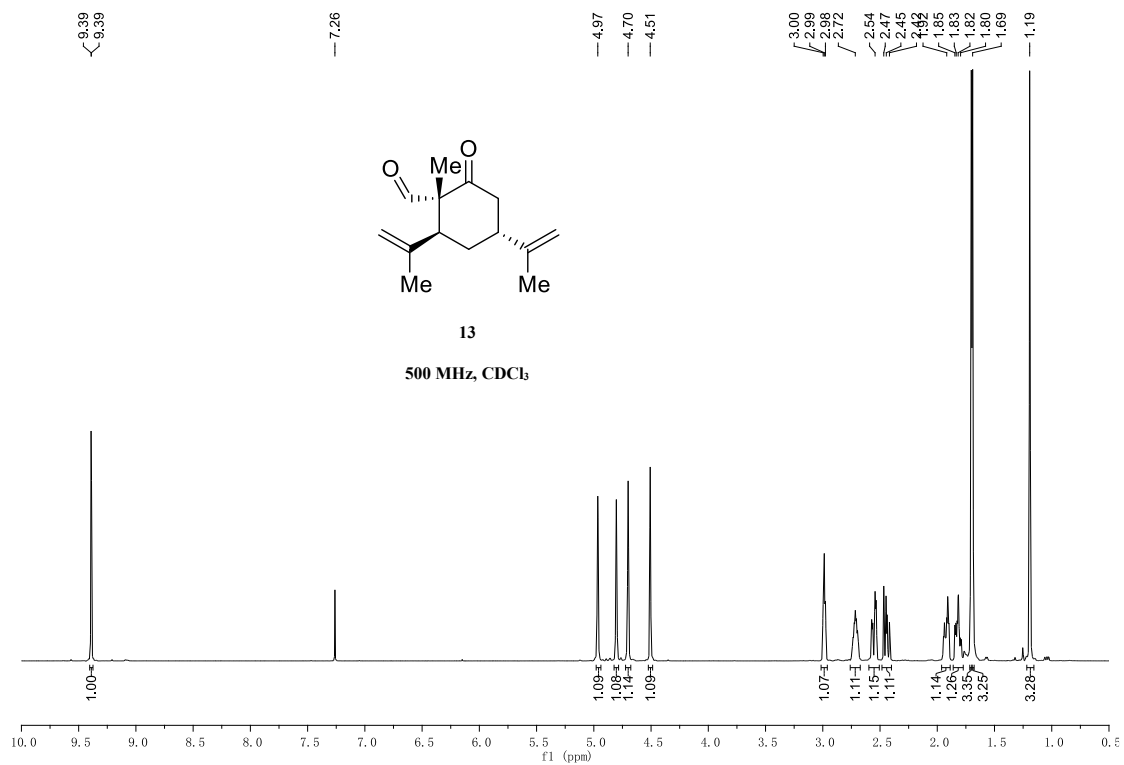

<sup>1</sup>H NMR of compound 13

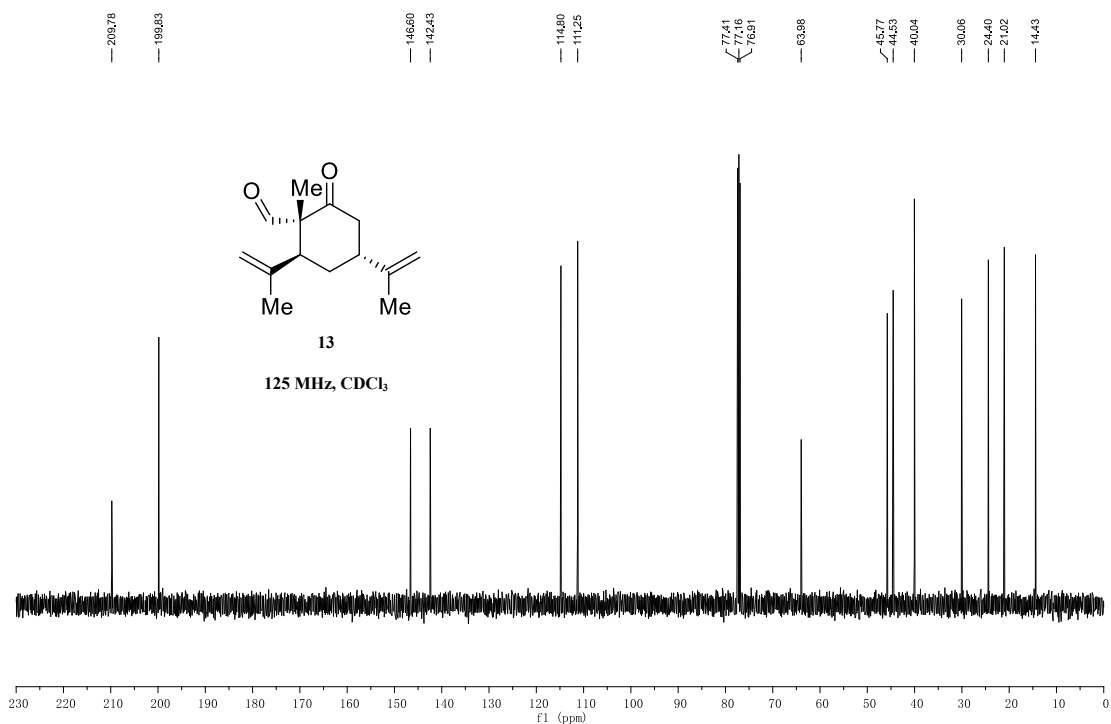

<sup>13</sup>C NMR of compound 13

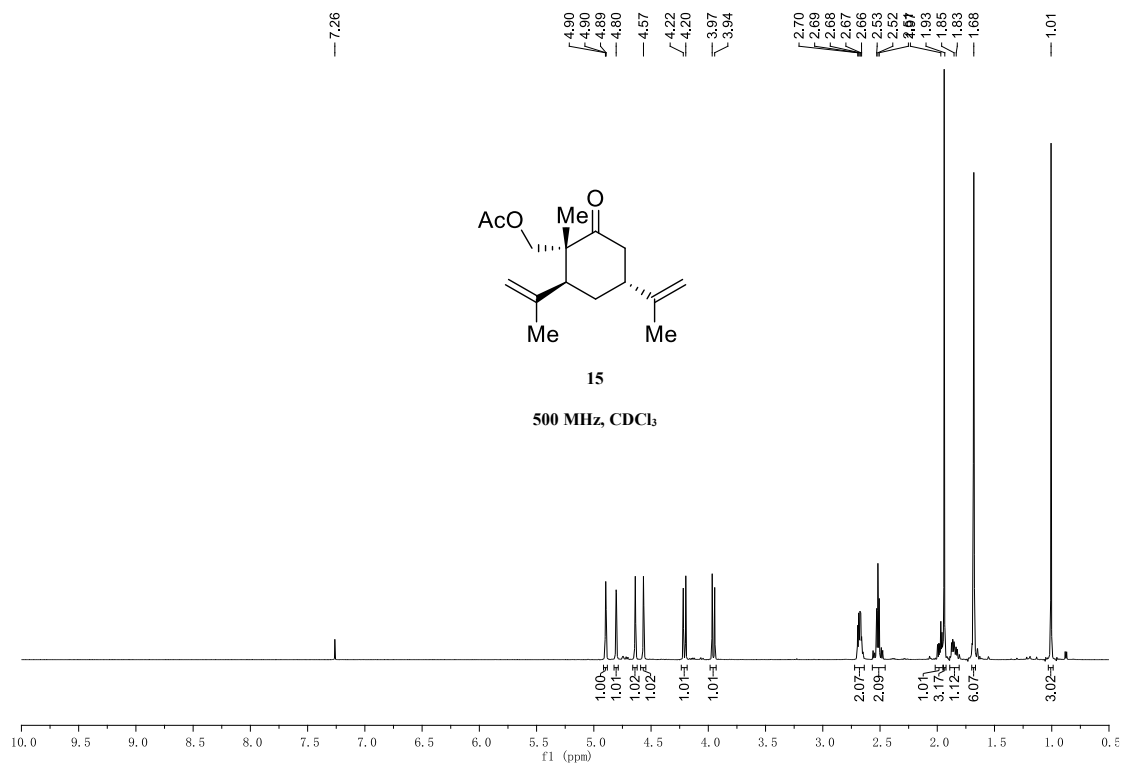

<sup>1</sup>H NMR of compound 15

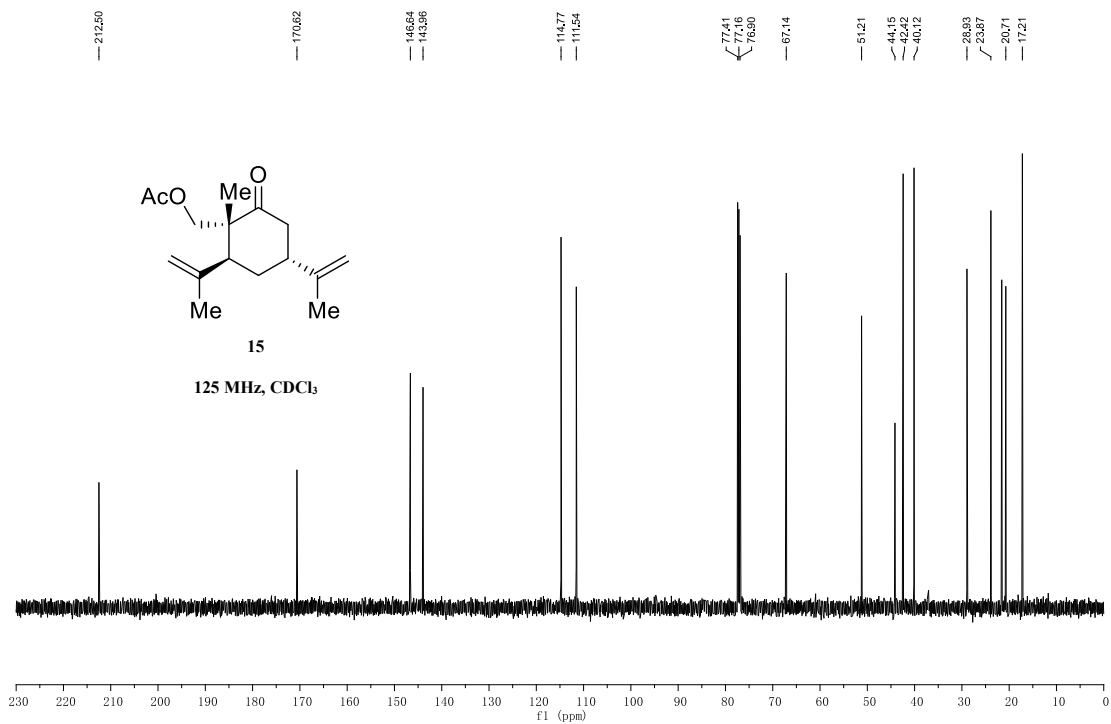

<sup>13</sup>C NMR of compound 15

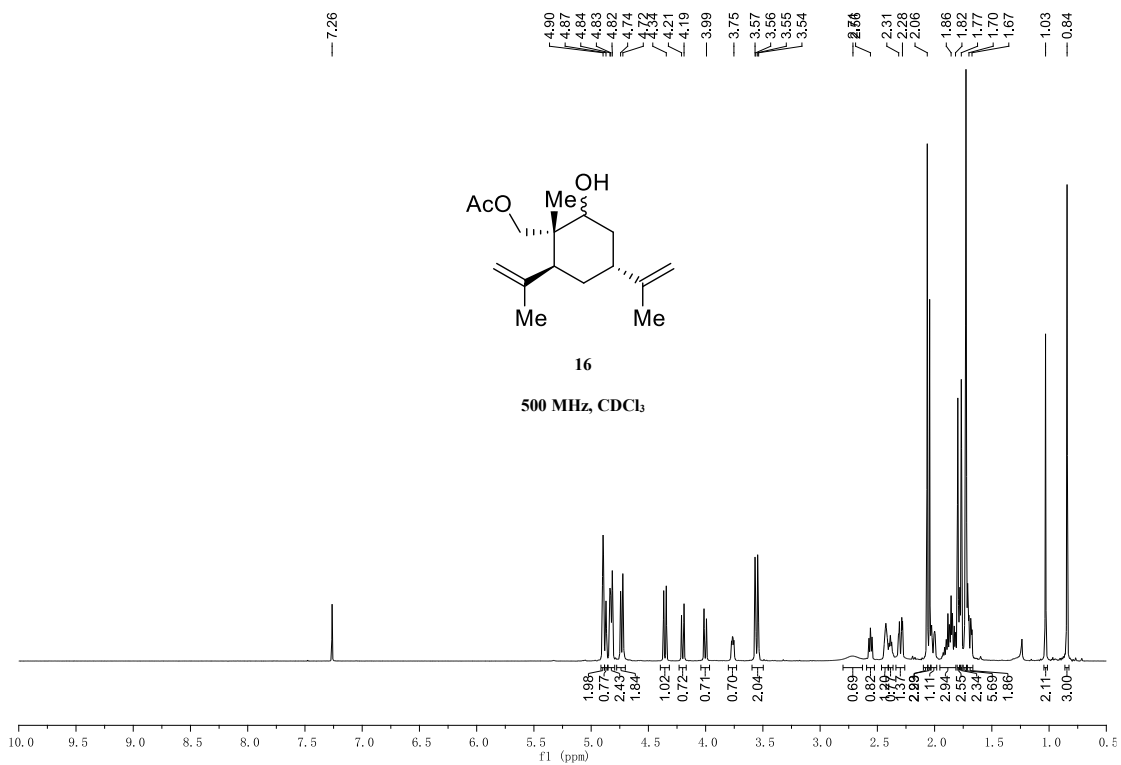

<sup>1</sup>H NMR of compound **16**

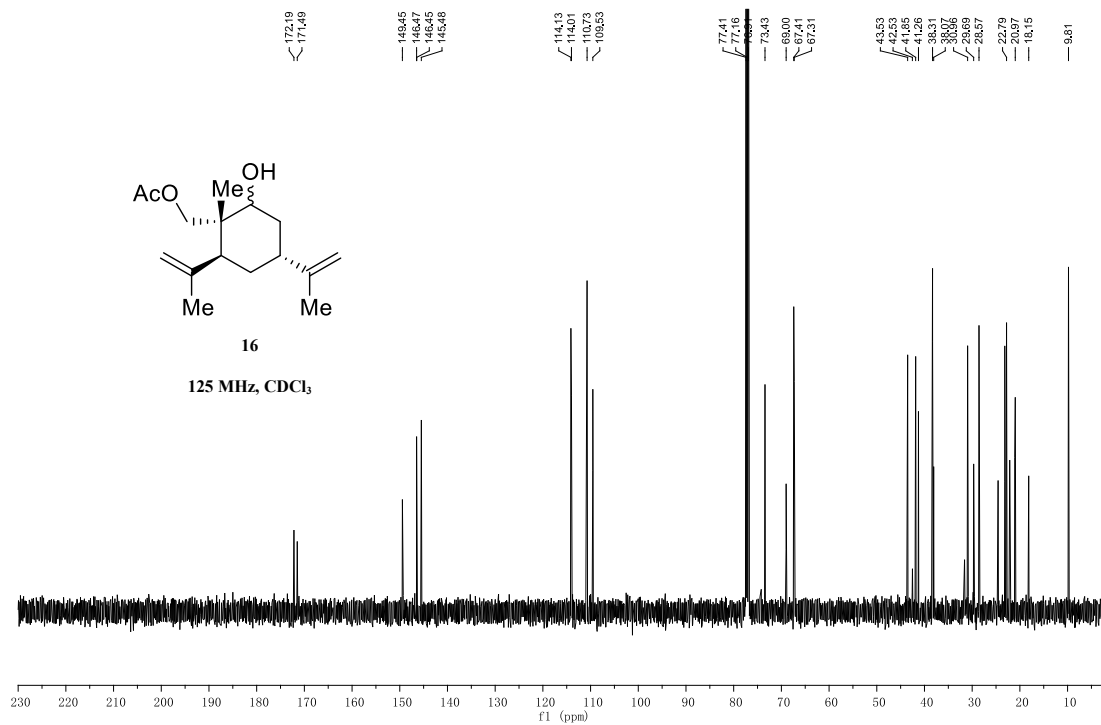

<sup>13</sup>C NMR of compound **16**

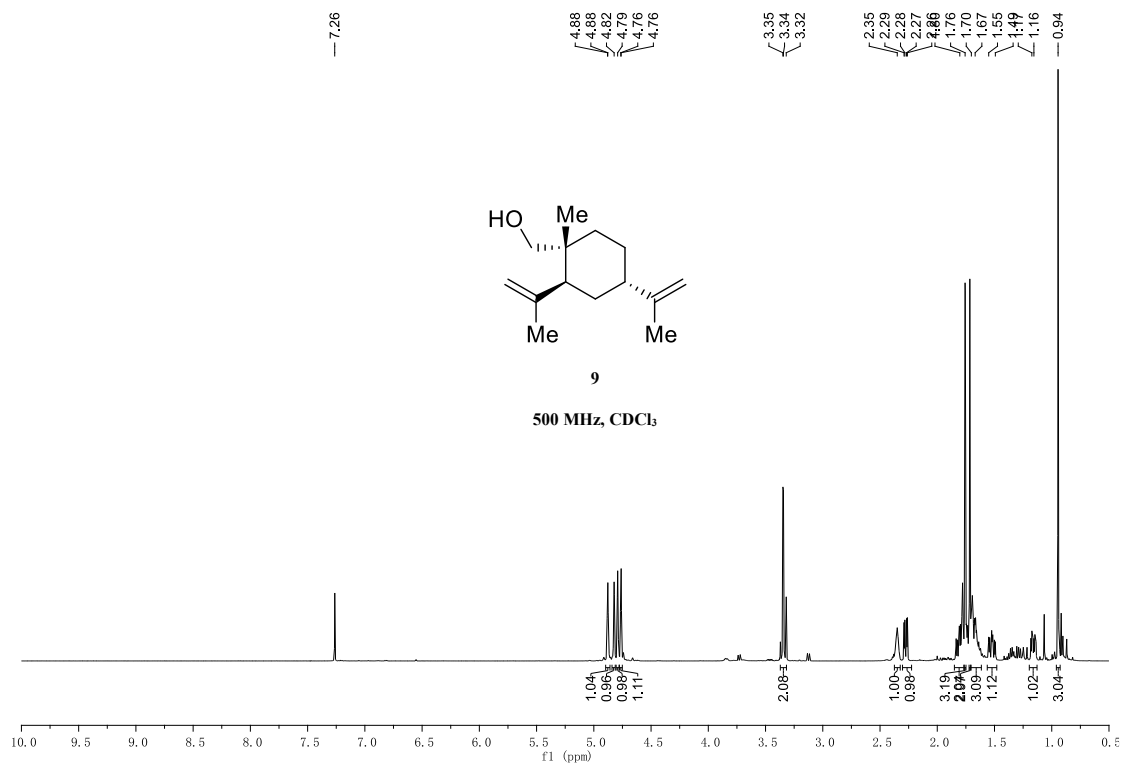

<sup>1</sup>H NMR of compound **9**

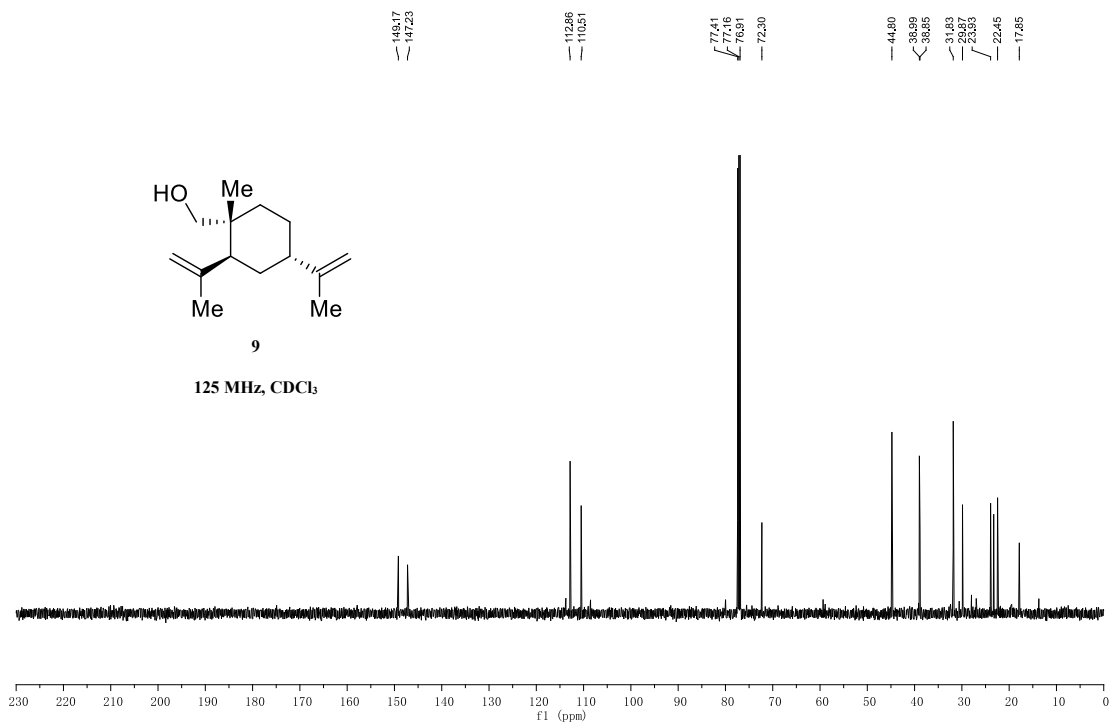

<sup>13</sup>C NMR of compound **9**



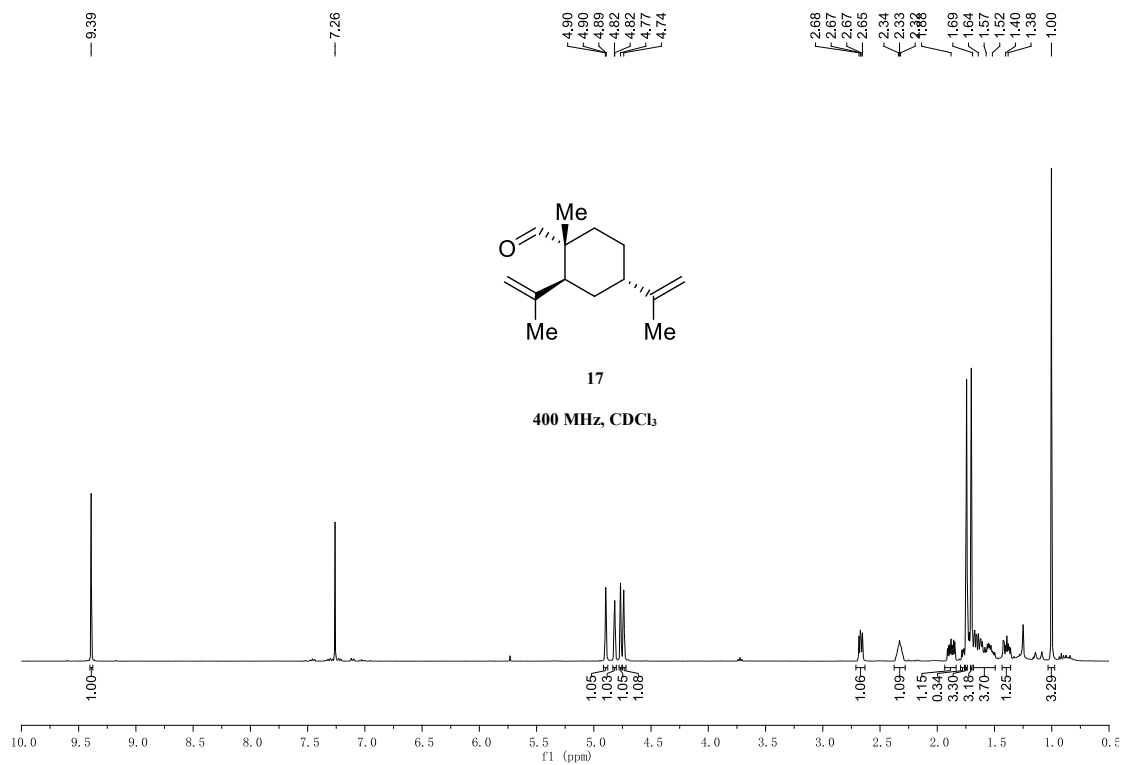

$^1\text{H}$  NMR of compound **17**

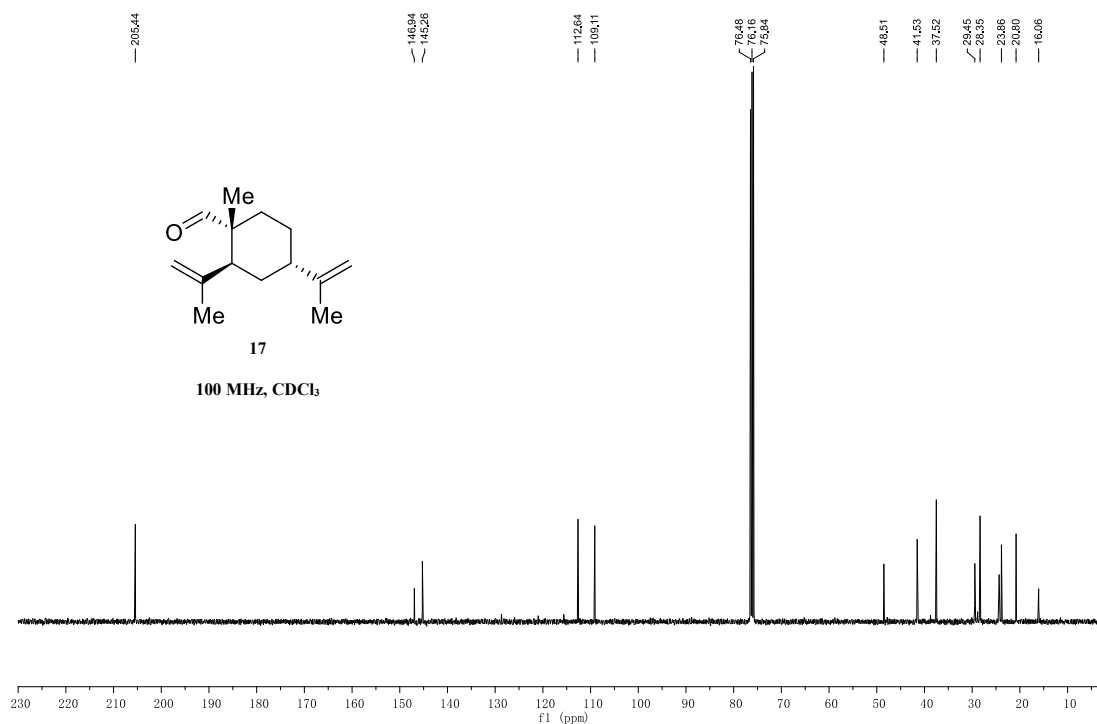

$^{13}\text{C}$  NMR of compound **17**

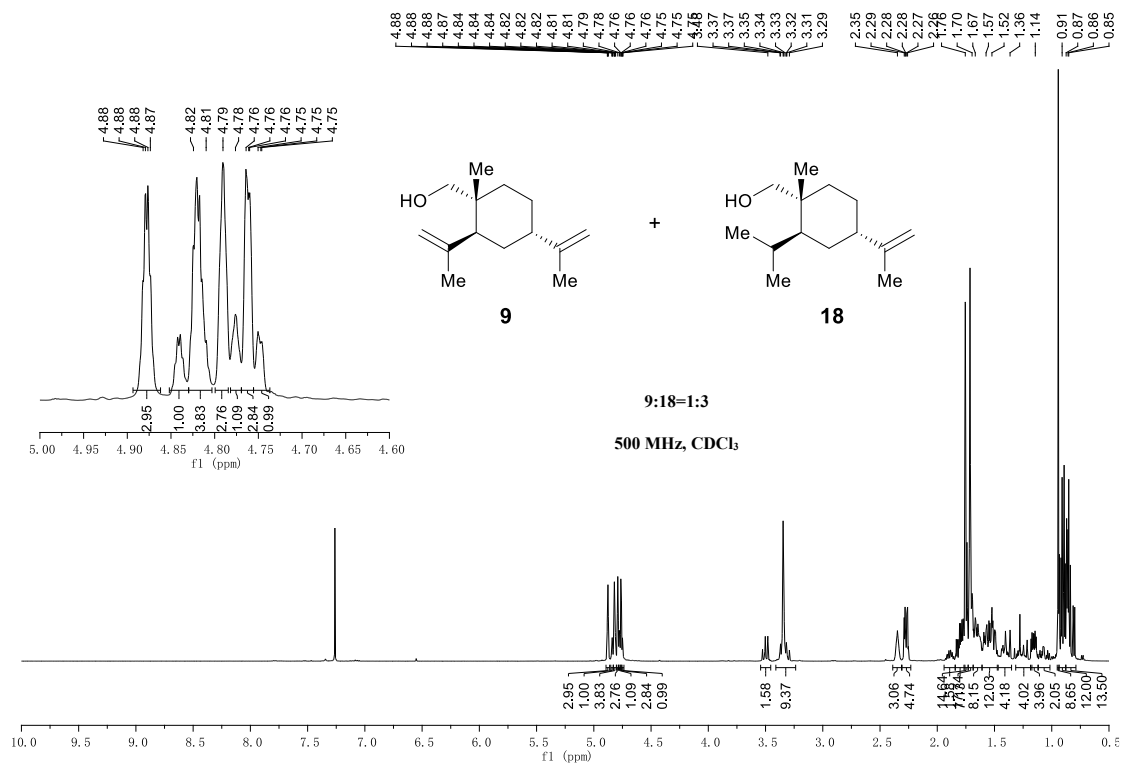

<sup>1</sup>H NMR of compound **9** and **18**

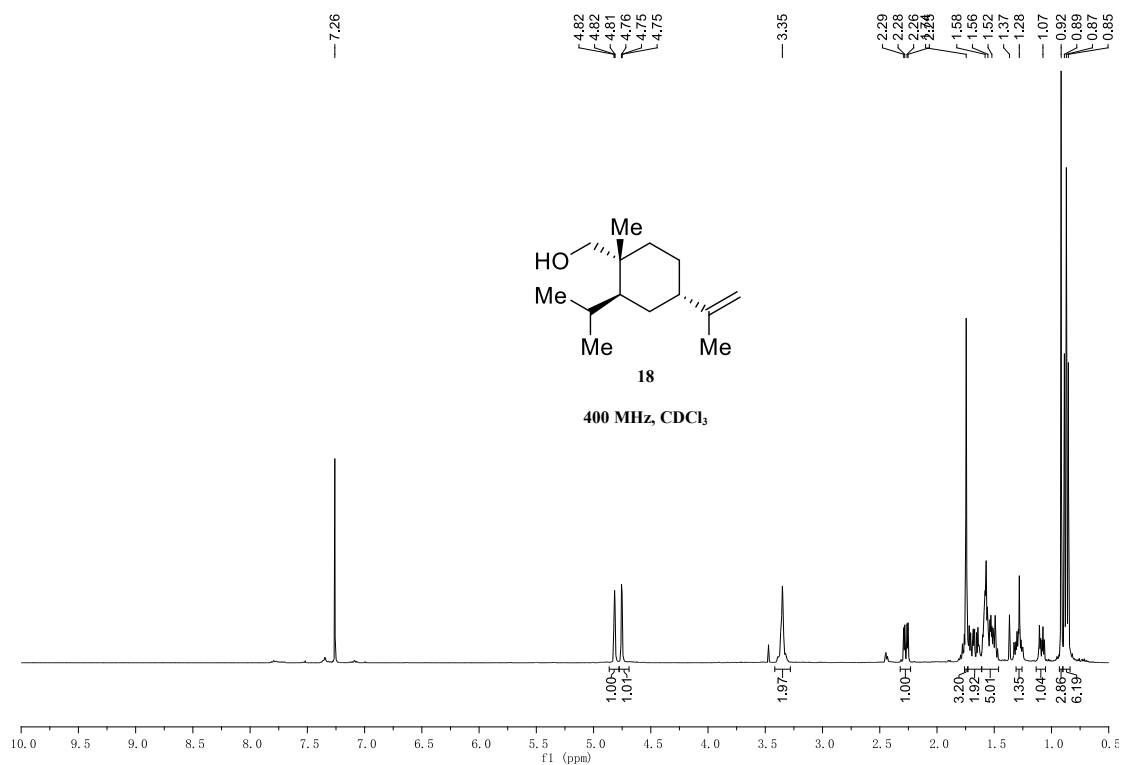

<sup>1</sup>H NMR of compound **18**

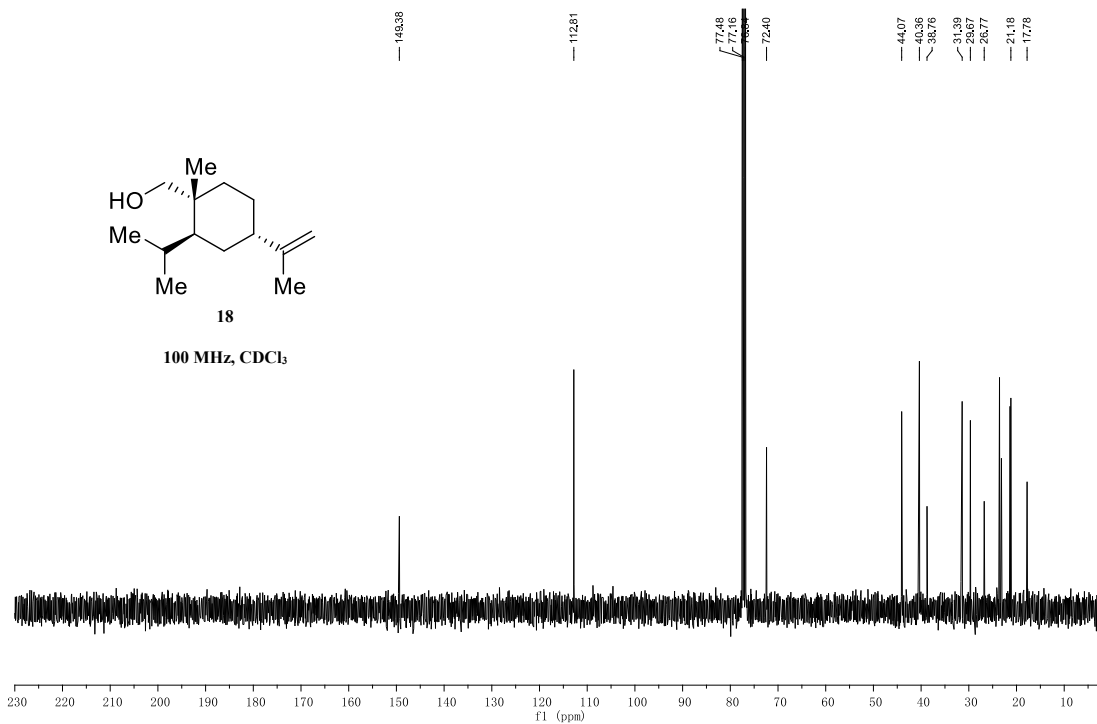

<sup>13</sup>C NMR of compound **18**

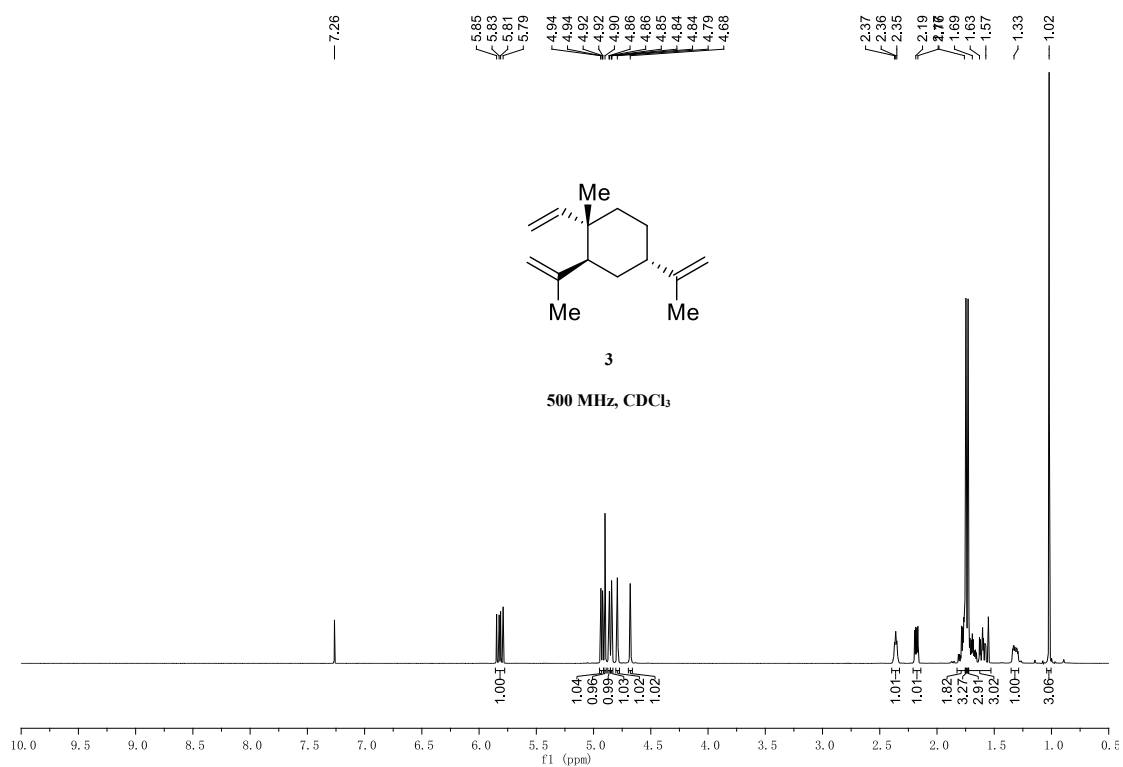

<sup>1</sup>H NMR of compound (1*S*,2*S*,4*S*)- $\beta$ -elemene (**3**)

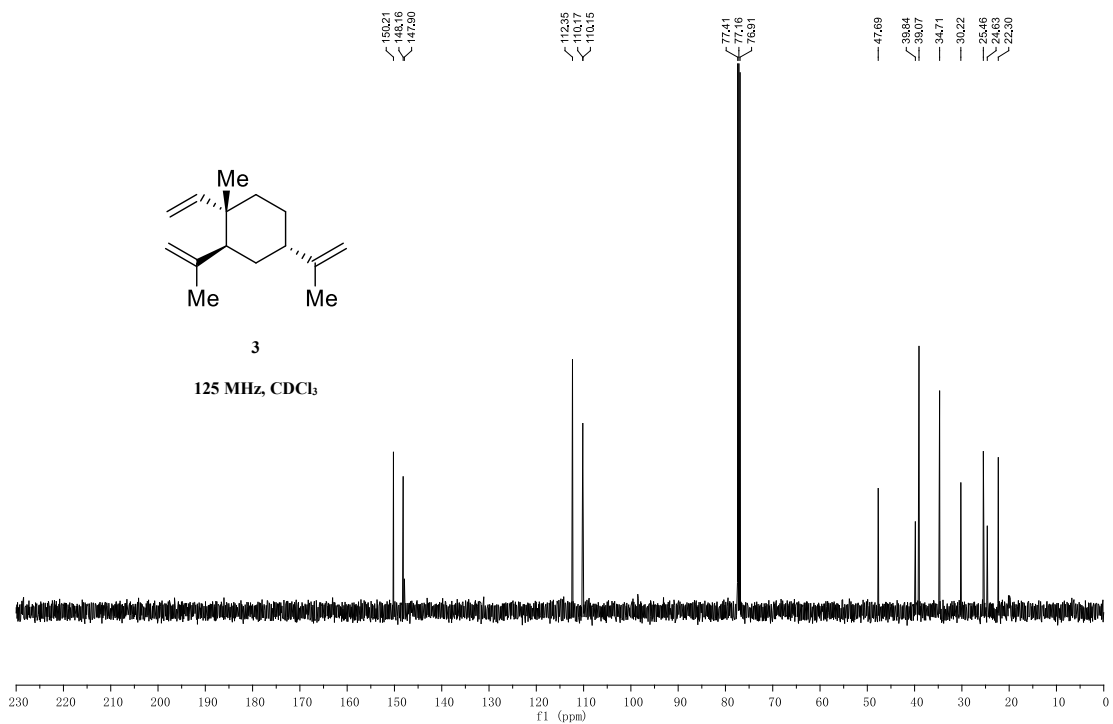

$^{13}\text{C}$  NMR of compound (1*S*,2*S*,4*S*)- $\beta$ -elemene (**3**)
